# Supplementary material for: Antimicrobial peptide-grafted PLGA-PEG nanoparticles to fight bacterial wound infections
Source: Royal Society of Chemistry journal article supplement (doi:10.1039/d2bm01127a), 2022-11-23
Supplement: d2bm01127a1.pdf [file d2bm01127a1.pdf]

## Supplementary Materials

# Antimicrobial Peptide-grafted PLGA-PEG Nanoparticles to Fight Bacterial Wound Infections

António Miguel Ramôa <sup>a,b, c, d</sup>, Filipa Campos <sup>a,b</sup>, Luís Moreira <sup>a,b,e</sup>, Cátia Teixeira <sup>f</sup>, Victoria Leiro <sup>a,b</sup>, Paula Gomes <sup>f</sup>, José das Neves <sup>a,b</sup>, M. Cristina L. Martins <sup>a,b,c, \*</sup>, Cláudia Monteiro <sup>a,b, \*</sup>

<sup>a</sup> i3S, Instituto de Investigação e Inovação em Saúde, Universidade do Porto

<sup>b</sup> INEB, Instituto de Engenharia Biomédica, Universidade do Porto, Rua Alfredo Allen, 208, 4200-135 Porto, Portugal

<sup>c</sup> Instituto de Ciências Biomédicas Abel Salazar, Universidade do Porto, Rua de Jorge Viterbo Ferreira, 228, 4050-313 Porto, Portugal

<sup>d</sup> Faculdade de Engenharia, Universidade do Porto, Rua Dr. Roberto Frias, s/n, 4200-465 Porto, Portugal

<sup>e</sup> Escola Superior de Biotecnologia, Universidade Católica do Porto, Rua de Diogo Botelho, 1327, 4169-005 Porto

<sup>f</sup> LAQV-REQUIMTE, Departamento de Química e Bioquímica, Faculdade de Ciências, Universidade Porto, Rua do Campo Alegre, 4169-007 Porto, Portugal

\*Authors equally contributed to this work

Emails: [claudia.monteiro@ineb.up.pt](mailto:claudia.monteiro@ineb.up.pt), [cmartins@ineb.up.pt](mailto:cmartins@ineb.up.pt)

## Experimental Section

### Peptide purification and analysis

The crude peptide products were purified by reverse phase-high performance liquid chromatography (RP-HPLC) at preparative scale, on a Hitachi-Merck LaPrep Sigma system equipped with an LP3104 UV detector and an LP1200 pump, using an RP-C18 column (250 × 25 mm, 5 µm pore size) and an elution gradient using 0.05% aqueous trifluoroacetic acid (TFA) as solvent A and acetonitrile (ACN) as solvent B. The pure peptides fractions were collected, pooled, and freeze-dried on a Virtis Benchtop 9L freeze-dryer to afford the final peptides as fluffy white solids. Peptides' purity degrees were confirmed by analytical RP-HPLC using a Hitachi-Merck LaChrom Elite system equipped with a quaternary pump, a thermostatted automated sampler, and a diode array detector; analyses were performed with a reverse-phase C18 column (150 × 4.6 mm ID and 5 µm pore size, Merck) at a 1 mL/min flow rate using a 1–100% gradient of solvent B in solvent A, for 30 min, with detection at 220 nm. Peptides' molecular weights were confirmed by electrospray ionization-ion trap mass spectrometry (ESI-IT MS). Peptides' stock solutions were prepared at approximately 10 mg/mL in distilled water for accurate quantitation by microvolume spectrophotometry at 205 nm, using a Thermo Scientific™ NanoDrop™ One system and the quantitation method 31 that assumes an extinction coefficient (ε) at 205 of 31 mL·mg<sup>-1</sup>·cm<sup>-1</sup>.

## Results

### Instrumental Analysis

Electrospray ionization-ion trap mass spectrometry (ESI-IT MS) analyses were run in a Thermo Finnigan LCQ Deca XP Max LC/MSn instrument using ion-trap quadrupole detection in positive mode.

Reverse phase high performance liquid chromatography (RP-HPLC) analyses were performed in a Hitachi-Merck LaChrom Elite system equipped with an L-2130 quaternary pump, an L-2455 diode-array detector (DAD) and an L220 thermostatted automated sampler. The samples were injected in a C18 column (125×4.0 mm ID and 5 µm pore size) with the elution gradient of 1 to 100% of B in A, using 0.05% aqueous trifluoroacetic acid (TFA) as solvent A and acetonitrile (ACN) as solvent B, and was run for 30 min at the flow rate of 1mL/min. The detection was performed at 220 nm.

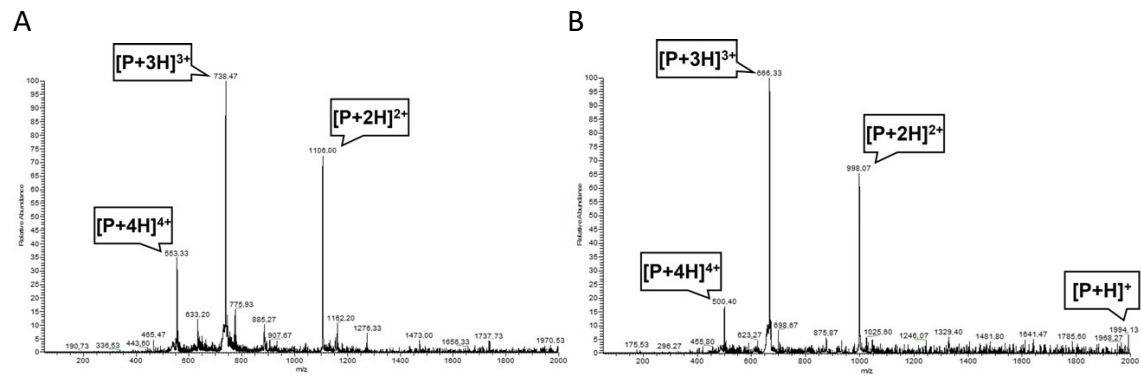

Figure 1- ESI-IT(+) mass spectrum of the (A) MSI-78 (4-20) and (B) MSI-78 (4-20)-Ahx-Cys. Multiply charged molecular ions of the target peptide, typically observed in ESI-IT MS analyses, are indicated as  $[M+nH]n^+$ .

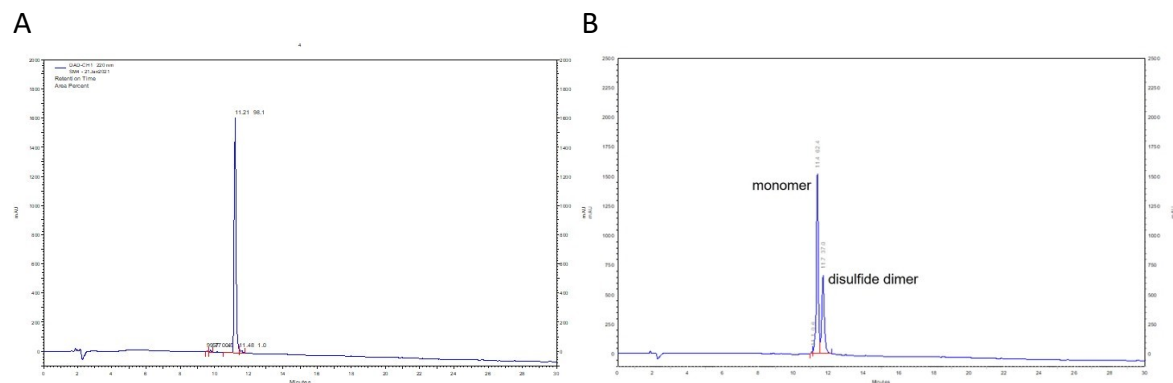

Figure 2 - RP-HPLC chromatogram of the (A) MSI-78 (4-20) and (B) MSI-78 (4-20)-Ahx-Cys.

## References

- 1 Loughrey S, Mannion J, Matlock B. Using the NanoDrop One to Quantify Protein and Peptide Preparations at 205 nm, on Thermo Fisher Scientific, Wilmington, DE. <http://tools.thermofisher.com/content/sfs/brochures/ND-One-Protein-and-Peptide-r16-01-18.pdf>
